# Supplementary material for: Micronuclei among Individuals from Three Colombian Mining Contexts Exposed to Pesticides and Chemical Element Mixtures
Source: Preprints.org preprint supplement (doi:10.20944/preprints202307.0551.v1), 2023-07-10
Supplement: Supplementary file 3 [file supplementary]

Appendix A. Main chemical element mixtures in each mining site obtained with principal component analysis.

**Figure A1.** Main chemical element mixtures in Montelibano (Fe/Ni open-pit mine)

**Figure A2.** Main chemical element mixtures in Nechí (Au alluvial mine)

**Figure A3.** Main chemical element mixtures in Aranzazu (Hg closed mine)
